# Supplementary material for: RAB22A as a predictor of exosome secretion in the progression and relapse of multiple myeloma
Source: publisher site journal article supplement (doi:10.18632/aging.205565), 2024-03-01
Supplement: Supplementary file [file aging-v16i5-205565-supplementary-material-SD2.pdf]

## SUPPLEMENTARY TABLES

**Supplementary Table 1.**  
**Exosome-related genes.**

---

| <b>Gene</b> |
|-------------|
| YWHAG       |
| YWHAQ       |
| CLTC        |
| NCKAP1      |
| CFL1        |
| ACTB        |
| CCT4        |
| RDX         |
| GNA13       |
| CTNNB1      |
| TSG101      |
| CD9         |
| CD81        |
| CD63        |
| FLOT1       |
| ITGB1       |
| ITGA1       |
| HSP70       |
| PDCD6IP     |
| RAB27A      |
| RAB27B      |
| PIKFYVE     |
| HRS         |
| SYT7        |
| CTTN        |
| STAT3       |
| PKM2        |
| UNC13D      |
| EGFR        |
| RAS         |
| EIF3C       |
| STK11       |
| YWHAG       |

---

**Supplementary Table 2.  
Immune checkpoint  
genes.**

| <b>Gene</b> |
|-------------|
| BTNL3       |
| BTNL9       |
| C10orf54    |
| CD209       |
| CD226       |
| CD27        |
| CD274       |
| CD276       |
| CD47        |
| CD80        |
| CTLA4       |
| HAVCR2      |
| HLA-B       |
| HLA-DMA     |
| HLA-DRA     |
| LAG3        |
| PDCD1       |
| PDCD1LG2    |
| PVR         |
| SIRPA       |
| TDO2        |
| TIGIT       |
| TNFRSF14    |
| TNFRSF4     |
| TNFSF14     |

**Supplementary Table 3.  
M6A-related genes.**

| <b>Gene</b> | <b>Type</b> |
|-------------|-------------|
| METTL3      | writers     |
| METTL14     | writers     |
| VIRMA       | writers     |
| RBM15       | writers     |
| RBM15B      | writers     |
| CBLL1       | writers     |
| HNRNPC      | readers     |
| FMR1        | readers     |
| HNRNPA2B1   | readers     |
| IGFBP1      | readers     |
| IGFBP2      | readers     |
| IGFBP3      | readers     |
| FTO         | erasers     |
| ALKBH5      | erasers     |

**Supplementary Table 4. PSM analysis.**

| <b>Match type</b>                | <b>Count</b> |
|----------------------------------|--------------|
| Exact Matches                    | 4            |
| Fuzzy Matches                    | 21           |
| Unmatched Including Missing Keys | 46           |
| Unmatched with Valid Keys        | 46           |
